# Supplementary material
Source: MDPI journal article supplement (https://www.mdpi.com/2313-0105/10/4/121)
Supplement: s1 [file s1]

## Supporting information

### $\text{Na}_4\text{Fe}_3(\text{PO}_4)_2(\text{P}_2\text{O}_7)@\text{C}/\text{Ti}_3\text{C}_2\text{T}_x$ Hybrid Cathode Materials with Enhanced Performances for Sodium-Ion Batteries

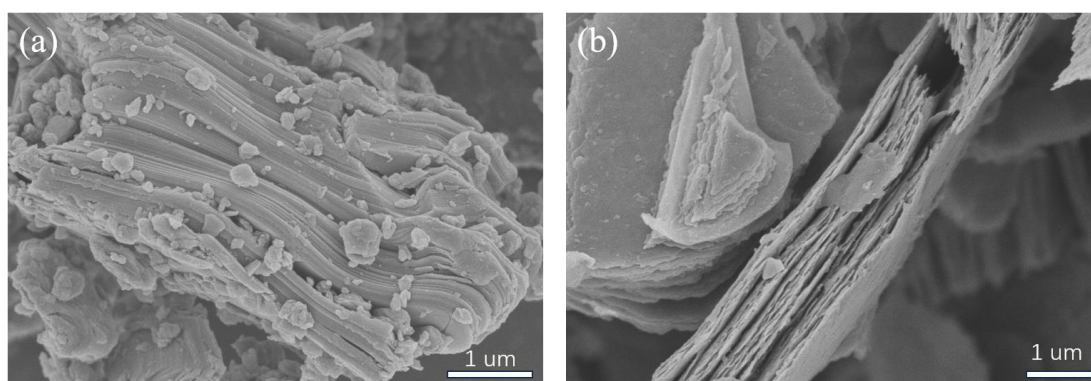

**Figure S1** (a) SEM images of (a)  $\text{Ti}_3\text{AlC}_2$  powders, and (b)  $\text{Ti}_3\text{C}_2\text{T}_x$  powders.

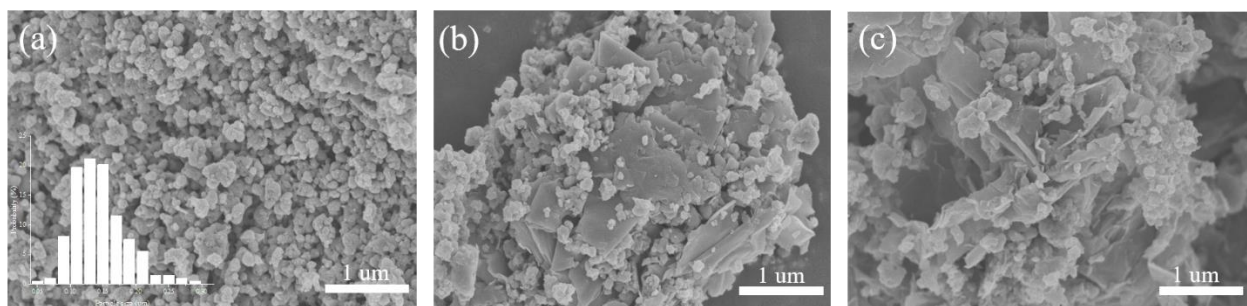

**Figure S2** SEM images of (a) NFPP@C, (b)NFPP/MX, and (c) NFPP@MX.

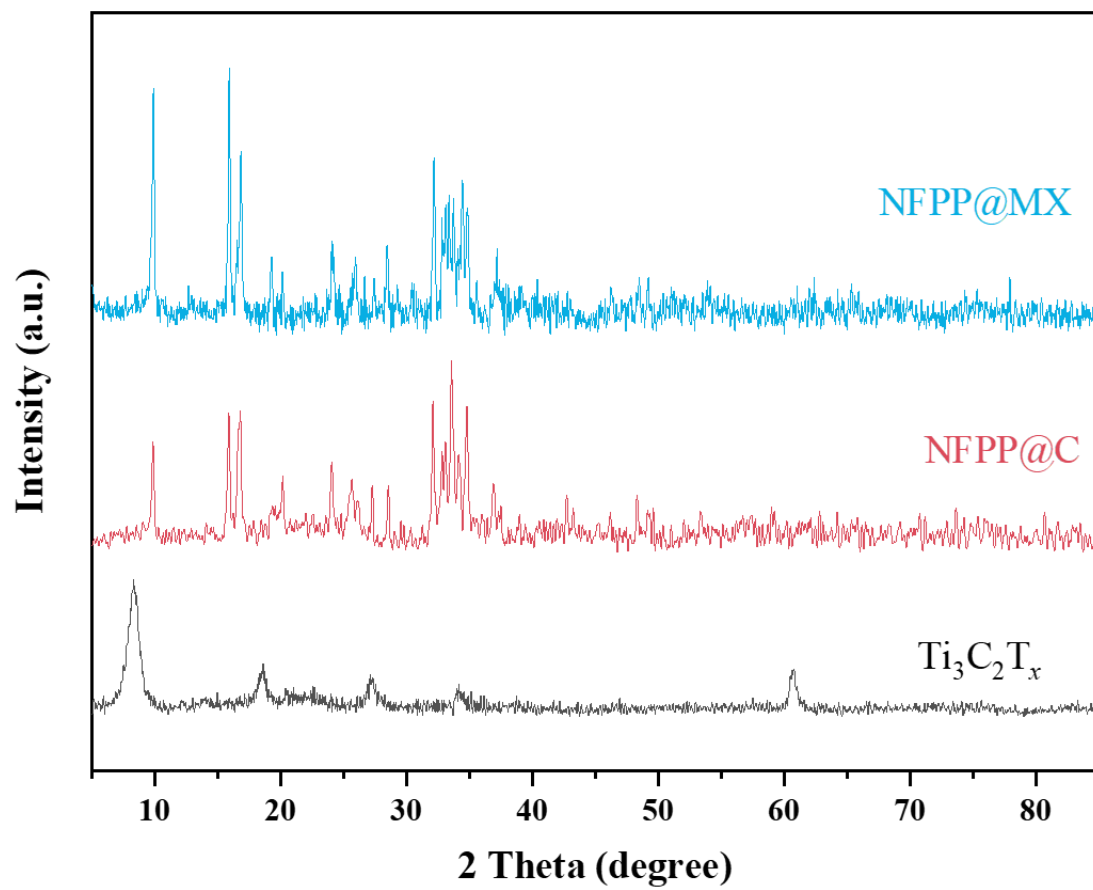

**Figure S3** XRD patterns of  $\text{Ti}_3\text{C}_2\text{T}_x$ , NFPP@C and NFPP@MX.

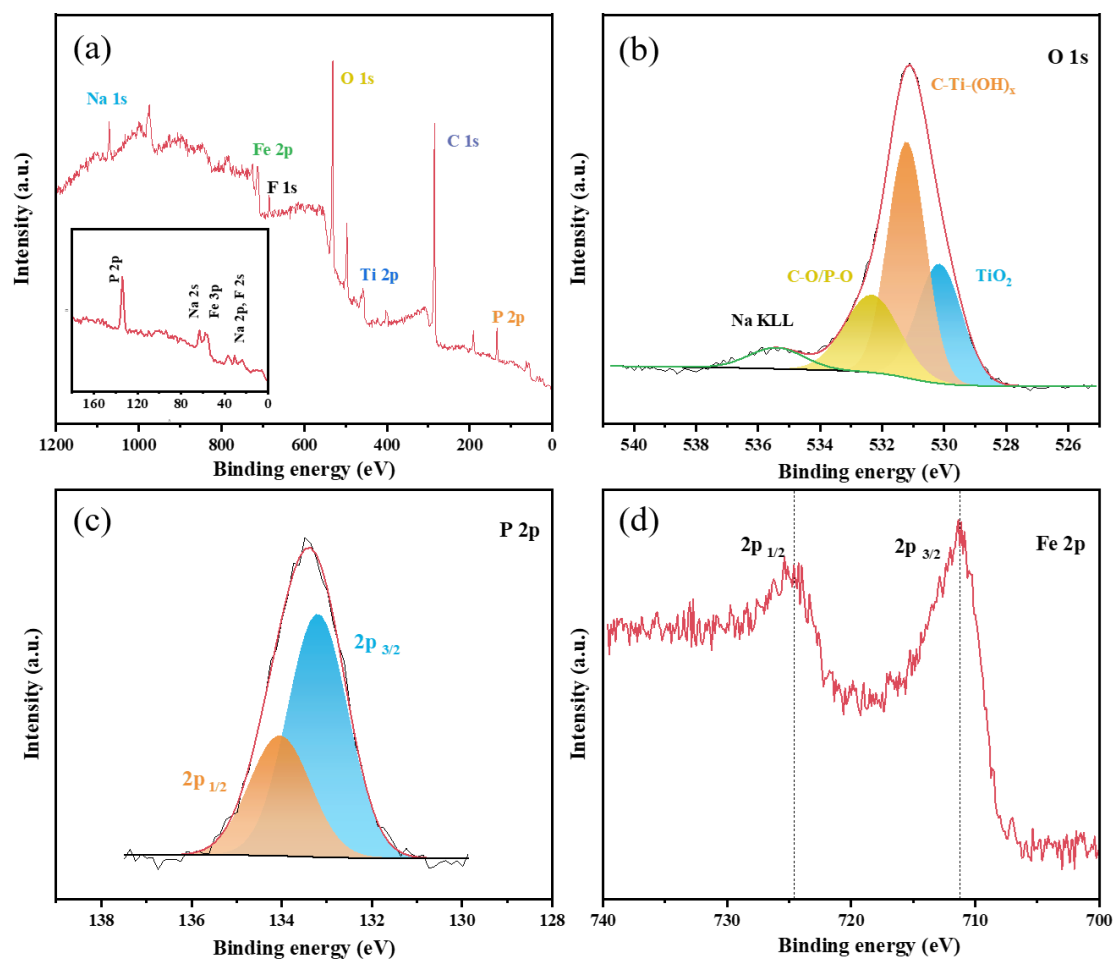

**Figure S4** (a) Full XPS spectrum of NFPP@MX composite and corresponding XPS spectra of (b) O 1s region, (c) P 1s region, (d) Fe 2p region.

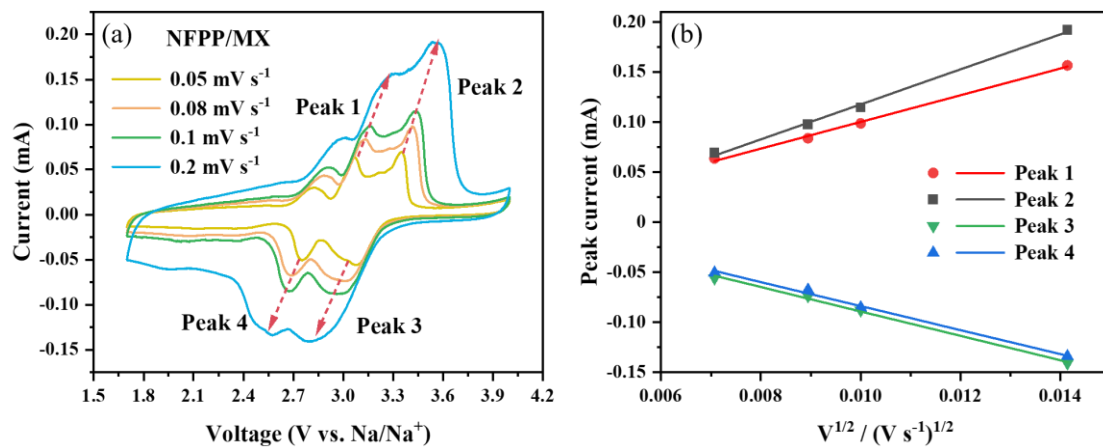

**Figure S5** CV curves of (a) NFPP/MX cathodes at various scanning rates (0.05, 0.08, 0.1, and 0.2 mV s<sup>-1</sup>) and (b) corresponding relationships between  $i_p$  and  $v_{1/2}$ .

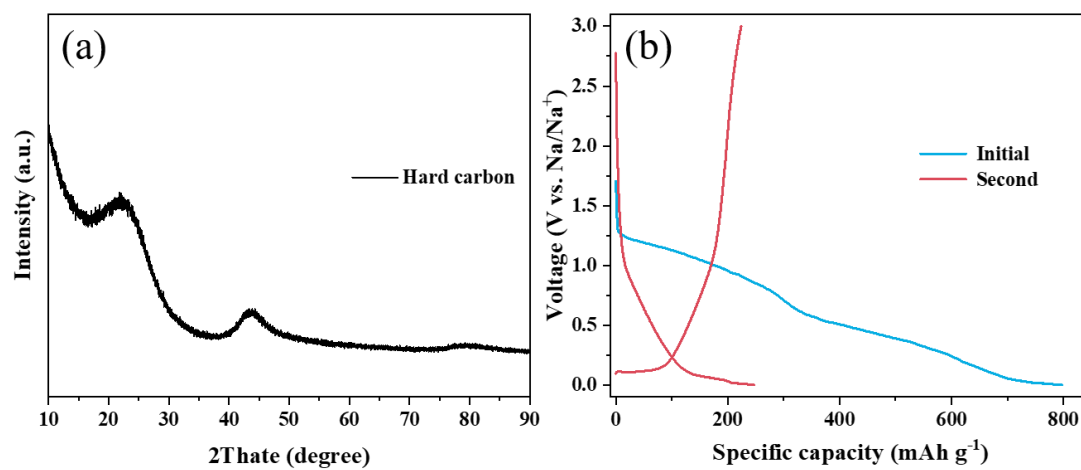

**Figure S6** (a) XRD pattern for CHC sample, (b) charge/discharge curves of CHC//Na half cells at 50 mA g<sup>-1</sup>.

**Note S1** Carbon content calculation process

The chemical formula is as follows:

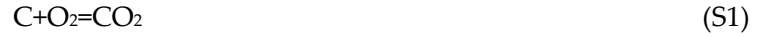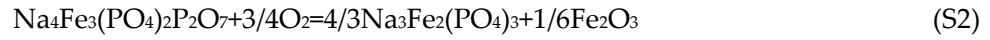

Assuming the mass of the composite is 1 g and the carbon content is  $x$  (base on mass), then the composite is  $(1-x)Na_4Fe_3(PO_4)_2P_2O_7 @ xC$ . After calcination, the mass increase part is the mass of  $O_2$  react with  $Na_4Fe_3(PO_4)_2P_2O_7$  which can be written as

$$m(3/4O_2) = (1-x) * M(3/4O_2) / M(Na_4Fe_3(PO_4)_2P_2O_7) \quad (S3)$$

Considering the mass loss part is  $x$ , so  $4.1 \text{ wt. \%} = x - m(3/4O_2)$  and  $x = 5.9 \text{ wt\%}$  is obtained.

**Table S1.** The calculated diffusion coefficients of the Na<sup>+</sup> ions (*D*) of NFPP@C, NFPP/MX, and NFPP@MX.

| Samples | NFPP@C<br>( <i>D</i> cm <sup>2</sup> s <sup>-1</sup> ) | NPP/MX<br>( <i>D</i> cm <sup>2</sup> s <sup>-1</sup> ) | NFPP@MX<br>( <i>D</i> cm <sup>2</sup> s <sup>-1</sup> ) |
|---------|--------------------------------------------------------|--------------------------------------------------------|---------------------------------------------------------|
| Peak 1  | 3.35×10 <sup>-12</sup>                                 | 5.25×10 <sup>-12</sup>                                 | 8.09×10 <sup>-12</sup>                                  |
| Peak 2  | 8.74×10 <sup>-12</sup>                                 | 9.04×10 <sup>-12</sup>                                 | 1.79×10 <sup>-11</sup>                                  |
| Peak 3  | 3.43×10 <sup>-12</sup>                                 | 4.40×10 <sup>-12</sup>                                 | 8.81×10 <sup>-12</sup>                                  |
| Peak 4  | 4.40×10 <sup>-12</sup>                                 | 4.25×10 <sup>-12</sup>                                 | 9.70×10 <sup>-12</sup>                                  |



**Table S2.** Simulation results of the EIS spectra of three electrodes.

| Sample                | NFPP@C | NFPP/MX | NFPP@MX |
|-----------------------|--------|---------|---------|
| $R_s$ ( $\Omega$ )    | 2.059  | 3.98    | 3.476   |
| $R_{ct}$ ( $\Omega$ ) | 2235   | 1505    | 1292    |

**Table S3.** Comparison of cathode materials for Na-ion batteries.

| Cathode material                                                                   | Specific capacity at 0.2C<br>(mAh g <sup>-1</sup> ) | Capacity retention          | Specific capacity at 10C<br>(mAh g <sup>-1</sup> ) | References |
|------------------------------------------------------------------------------------|-----------------------------------------------------|-----------------------------|----------------------------------------------------|------------|
| NFPP@MX                                                                            | 107.2                                               | 85.2%<br>(1000 cycles ,1C)  | 60.4                                               | This work  |
| NFPP/C-500                                                                         | 99                                                  | 89%<br>(300 cycles , 0.5C)  | 78                                                 | [1]        |
| NVOFP/Ti <sub>3</sub> C <sub>2</sub> T <sub>x</sub>                                | 111                                                 | 83.3%<br>(400 cycles , 5C)  | 83                                                 | [2]        |
| FNV-2                                                                              | 110                                                 | 98.66%<br>(600 cycles , 2C) | 103                                                | [3]        |
| NVTP-NS3                                                                           | 162.71                                              | 73.1%<br>(500 cycles, 2C)   | 78.18                                              | [4]        |
| Na <sub>6.88</sub> V <sub>2.81</sub> (P <sub>2</sub> O <sub>7</sub> ) <sub>4</sub> | 59.8(0.1C)                                          | 94.5%<br>(500 cycles 0.5C)  | 46.1                                               | [5]        |
| NFPP@MCNTs                                                                         | 107.1                                               | 96%<br>(1200 cycles 2C)     | 82.1                                               | [6]        |

1. Wu, X.; Zhong, G.; Yang, Y. Sol-gel synthesis of Na<sub>4</sub>Fe<sub>3</sub>(PO<sub>4</sub>)<sub>2</sub>(P<sub>2</sub>O<sub>7</sub>)/C nanocomposite for sodium ion batteries and new insights into microstructural evolution during sodium extraction. *Journal of Power Sources* **2016**, 327, 666-674.
2. Yue, L.; Wang, J.; Li, M.; Qin, J.; Cao, M. Conductive Ti<sub>3</sub>C<sub>2</sub>T<sub>x</sub> networks to optimize Na<sub>3</sub>V<sub>2</sub>O<sub>2</sub>(PO<sub>4</sub>)<sub>2</sub>F cathodes for improved rate capability and low-temperature operation. *Dalton Transactions* **2023**, 52, 4717-4727.
3. Kadam, S.; Kate, R.; Chothe, U.; Chalwadi, P.; Shingare, J.; Kulkarni, M.; Kalubarme, R.; Kale, B. Highly Stable MWCNT@NVP Composite as a Cathode Material for Na-Ion Batteries. *ACS Applied Materials & Interfaces* **2023**, 15, 34651-34661.
4. Zhu, Y.; Song, K.; Shen, S.; Liu, Z.; Xu, J.; Yang, L.; Zhao, L. Realizing efficient sodium storage property with NASICON-type Na<sub>2</sub>VTi(PO<sub>4</sub>)<sub>3</sub> modified by nitrogen and sulfur dual-doped carbon layer for sodium ion batteries. *Journal of Alloys and Compounds* **2021**, 856, 157992.
5. Li, J.; Wang, R.; Zhao, W.; Hou, X.; Paillard, E.; Ning, D.; Li, C.; Wang, J.; Xiao, Y.; Winter, M.; et al. A high-voltage symmetric sodium ion battery using sodium vanadium pyrophosphate with superior power density and long lifespan. *Journal of Power Sources* **2021**, 507, 230183.
6. Cao, Y.; Xia, X.; Liu, Y.; Wang, N.; Zhang, J.; Zhao, D.; Xia, Y. Scalable synthesizing nanospherical Na<sub>4</sub>Fe<sub>3</sub>(PO<sub>4</sub>)<sub>2</sub>(P<sub>2</sub>O<sub>7</sub>) growing on MCNTs as a high-performance cathode material for sodium-ion batteries. *Journal of Power Sources* **2020**, 461, 228130.
